# Supplementary material
Source: PubMed Central journal article supplement (PMC4036571)
Supplement: supp_tpc.114.123794_tpc123794_SupplementalRev.pdf [file supp_tpc.114.123794_tpc123794_SupplementalRev.pdf]

## Supplemental Figures

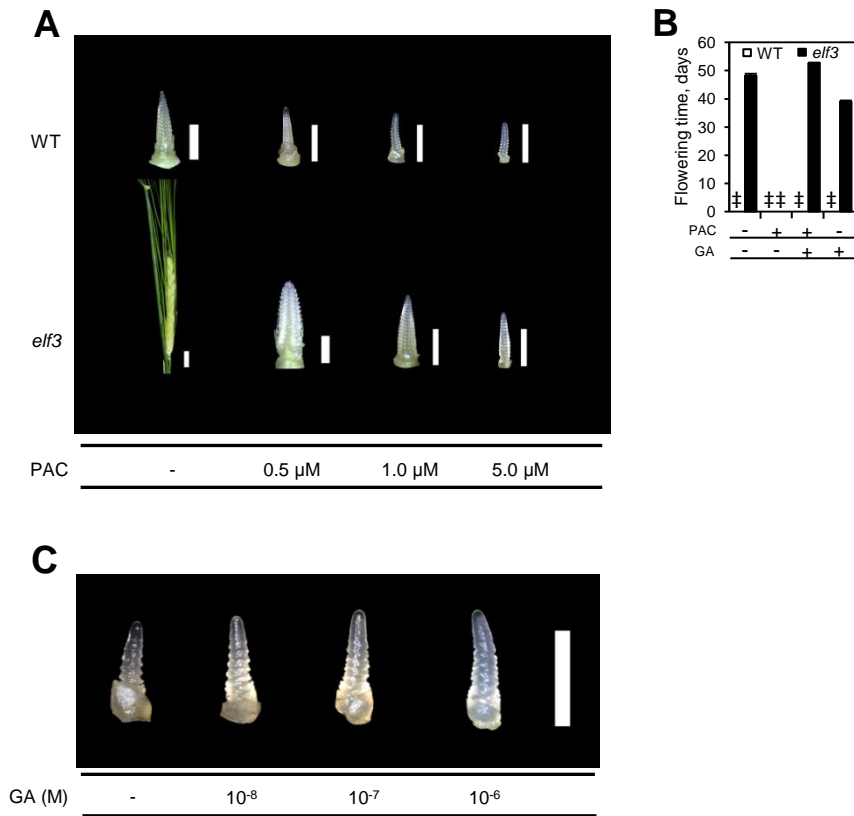

**Supplemental Figure 1: Inhibition of GA biosynthesis by PAC treatment delays flowering and inflorescence development of *elf3* plants.** (A) Inflorescence development of WT and *elf3* plants under SD conditions following treatment with varying amounts of PAC (0.5  $\mu$ M, 1  $\mu$ M and 5  $\mu$ M). The images of inflorescences were taken on the day when the spike of the *elf3* control plant emerged from the boot. Scales: immature inflorescences, 1 mm; mature spikes, 1 cm (B) Flowering time of WT and *elf3* plants under SD conditions following treatment with PAC (1  $\mu$ M), PAC (1  $\mu$ M) and GA ( $10^{-8}$  M) or GA ( $10^{-8}$  M) ( $\pm$ , plants did not flower). Data are the mean  $\pm$  SEM of 8 biological replicates. (C) Inflorescence development of WT (Bonus) from control and GA-treated plants that were harvested at the fifth leaf stage. Scale, 1mm.

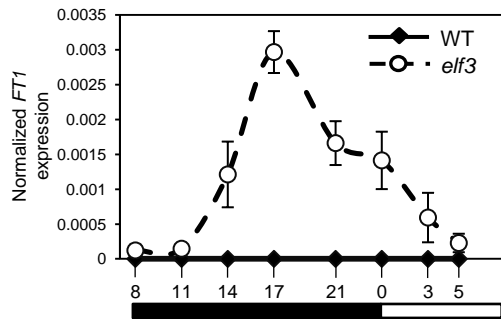

**Supplemental Figure 2. *FT1* expression is elevated in the *elf3* mutant, *mat.a-8*.** *FT1* expression is elevated in *elf3* leaves from plants grown under SD conditions, especially during the night-time phase of the diurnal cycle. Numbers on x-axis refer to time (hr) within 24 h cycle, with 0 h being dawn (lights on). Black and white rectangles illustrate periods of dark and light, respectively. Data are the mean  $\pm$  SEM of 3 biological replicates. Transcripts are normalized to *HvGAPDH*.

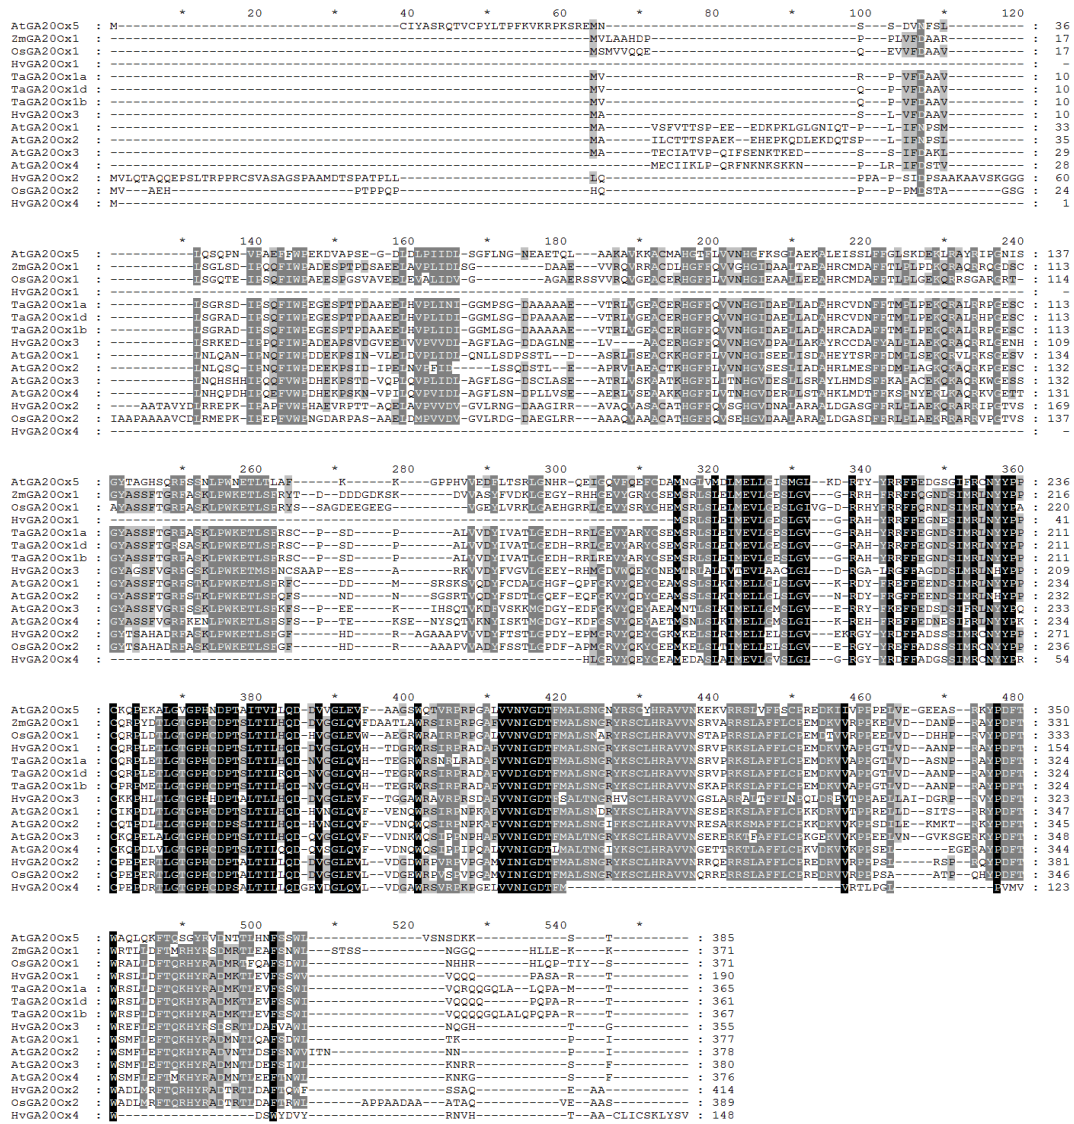

**Supplemental Figure 3. Alignments of GA20oxidase amino acid sequences.** Species include: *Arabidopsis thaliana* (At), *Zea mays* (Zm), *Hordeum vulgare* (Hv), *Triticum aestivum* (Ta) and *Oryza sativa* (Os). Alignments were generated with webPRANK and manually adjusted using Genedoc (Nicholas et al., 1997). Shading levels indicate degree of conservation: black - 100%, dark grey - 80%, light grey - 60%. Sequence details are given in Supplemental Table 3.

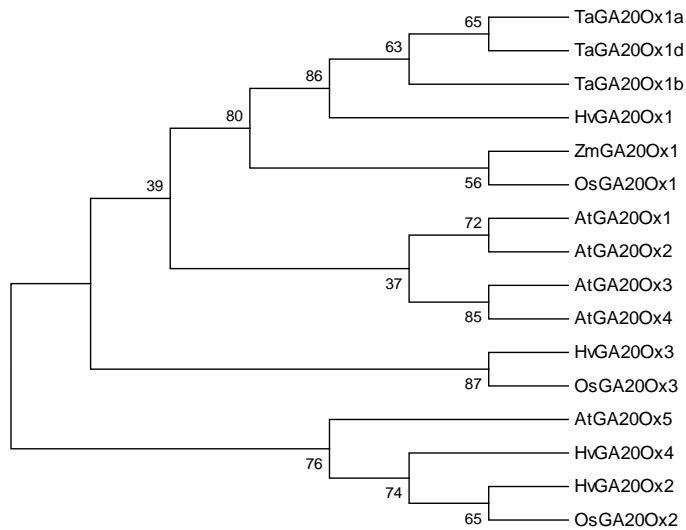

**Supplemental Figure 4: Maximum Likelihood phylogenetic tree of GA20oxidases.** Species include: *Arabidopsis thaliana* (At), *Zea mays* (Zm), *Hordeum vulgare* (Hv), *Triticum aestivum* (Ta), and *Oryza sativa* (Os). The unrooted tree, constructed in MEGA5 with 1000 bootstrap replicates, summarizes the evolutionary relationship among the GA20ox proteins. Parameters used for construction of tree included: JTT substitution model, Gamma distributed rates and partial deletions.

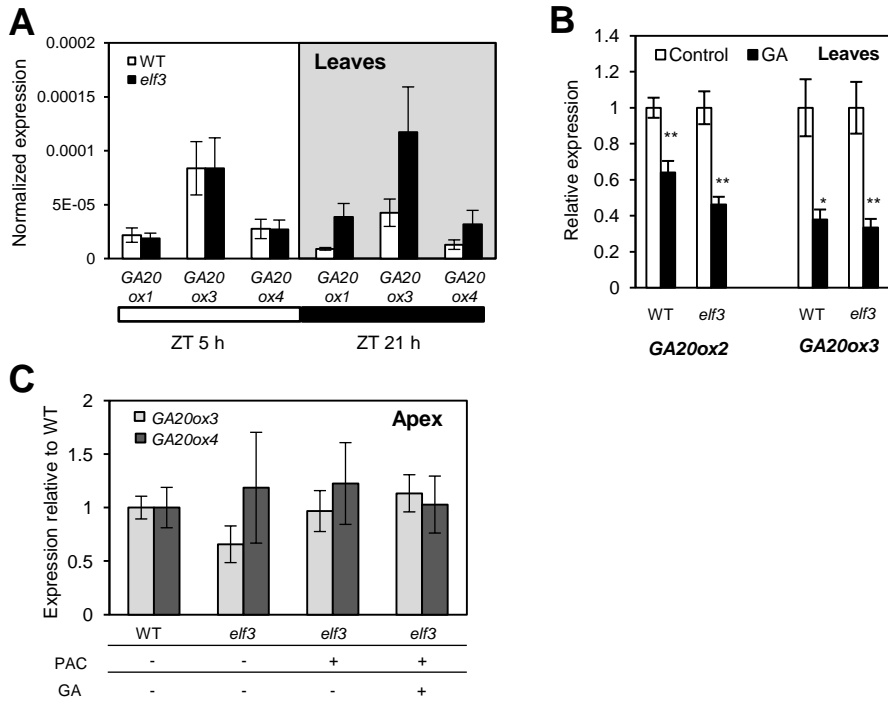

**Supplemental Figure 5. GA20oxidase expression analysis.** (A) Quantification of transcript levels for *GA20ox1*, *GA20ox3* and *GA20ox4* shows elevated transcript levels during the night-time (ZT 21 h) but not during the day (ZT 5 h). Black and white rectangles illustrate periods of dark and light, respectively. Data are the mean  $\pm$  SEM of 3 biological replicates. (B) Quantification of *GA20ox2* and *GA20ox3* expression in leaves of control and  $GA_3$  treated ( $10^{-4}$  M) WT and *elf3* plants. Data are the mean  $\pm$  SEM of 3 biological replicates. (\*,  $P < 0.05$ ; \*\*,  $P < 0.01$ ). (C) Quantification of *GA20ox3* and *GA20ox4* in the developing apex of WT and *elf3* plants, and also in *elf3* plants that have been treated with PAC (1  $\mu$ M) or PAC (1  $\mu$ M) +  $GA_3$  ( $10^{-7}$  M). *GA20ox1* transcripts were not detected. Data are the mean  $\pm$  SEM of 3 biological replicates, each containing 6 developing inflorescences. All data are from plants grown under SDs.

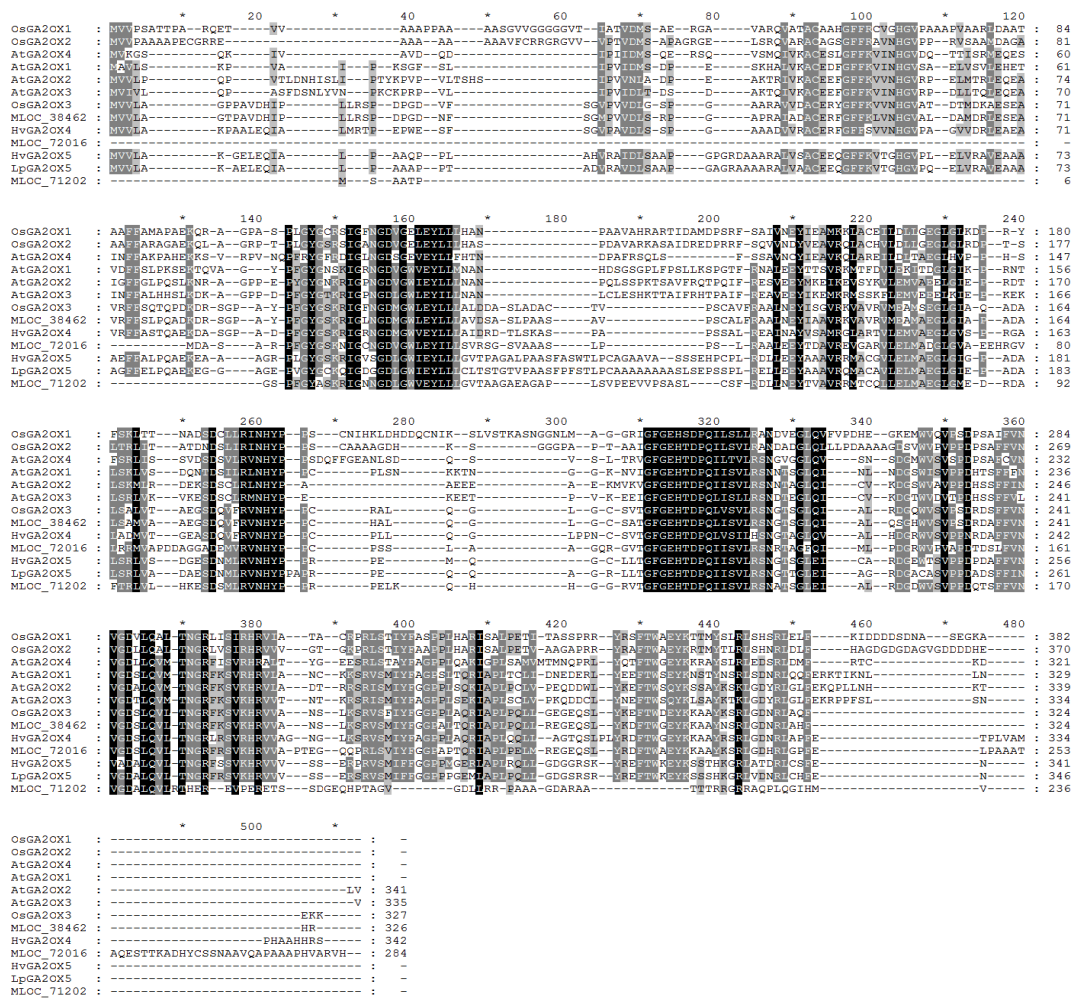

**Supplemental Figure 6. Alignments of GA2oxidase amino acid sequences.** Species include: *Arabidopsis thaliana* (At), *Hordeum vulgare* (Hv and MLOC), *Lolium perenne* (Lp) and *Oryza sativa* (Os). Alignments were generated with webPRANK and manually adjusted using Genedoc (Nicholas et al., 1997). Shading levels indicate degree of conservation: black - 100%, dark grey - 80%, light grey - 60%. Sequence details are given in Supplemental Table 3.

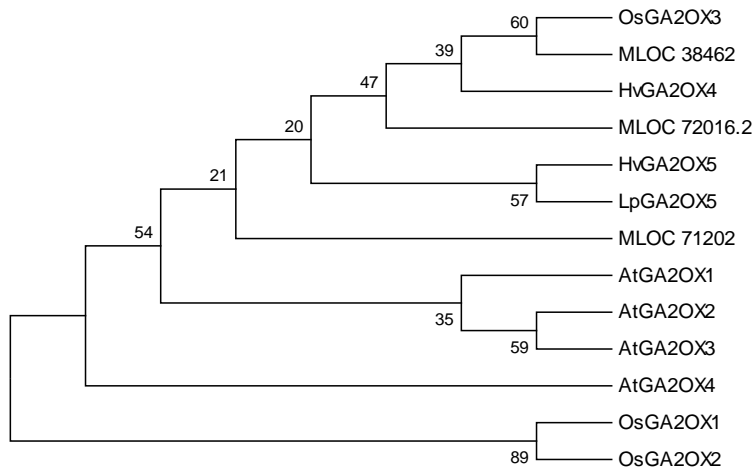

**Supplemental Figure 7: Maximum Likelihood phylogenetic tree of GA2oxidases.** Species include: *Arabidopsis thaliana* (At), *Hordeum vulgare* (Hv, MLOC accession numbers), *Oryza sativa* (Os) and *Lolium perenne* (Lp). The unrooted tree, constructed in MEGA5 with 1000 bootstrap replicates, summarizes the evolutionary relationship among the GA2ox proteins. HvGA2ox3 (MLOC 38462; this study), HvGA2ox4 and HvGA2ox5 (Spielmeyer et al., 2004) were named based on their similarity to rice genes. Parameters used for construction of tree included: JTT substitution model, Gamma distributed rates and partial deletions.

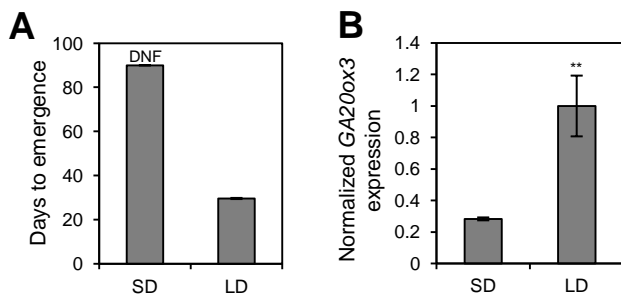

**Supplemental Figure 8. Flowering time and induction of *GA20ox3* in photoperiod responsive spring barley grown under SD and LD photoperiods.** (A) Quantification of flowering time for photoperiod responsive spring barley (CSIRO B07) grown under short day (SD) and long day (LD) photoperiods. SD grown plants did not flower during the course of the experiment (90 days; DNF). Data are the mean  $\pm$  SEM of 14 biological replicates. (B) *GA20ox3* expression in photoperiod responsive spring barley increases under LD conditions. This data is from RNA extracted from leaf samples at the fourth leaf stage, harvested at ZT 16 h. Data are the mean  $\pm$  SEM of 3 biological replicates (\*\*,  $P < 0.01$ ).



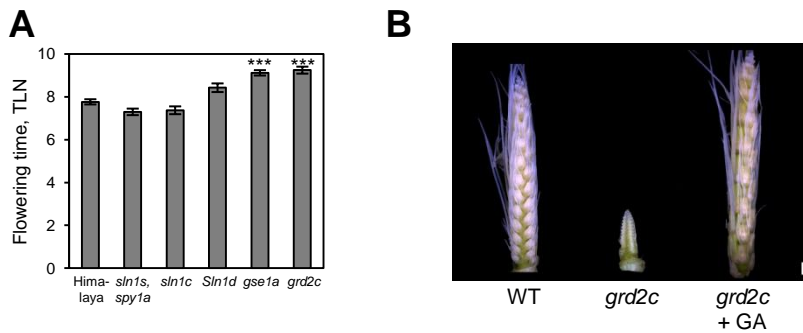

**Supplemental Figure 9. Flowering of GA biosynthesis and signaling mutants. (A)** Flowering time phenotypes of WT (Himalaya) and mutant plants with constitutive GA responses (*Sln1s*, *spy1a* and *sln1c*) or compromised GA responses (*Sln1d*, *gse1a* and *grd2c*), grown under LDs (TLN, total leaf number). Data are the mean  $\pm$  SEM of 10 biological replicates (\*\*\*,  $P < 0.001$ ). **(B)** Inflorescence development in the *grd2c* mutant is restored by application of GA<sub>3</sub> (10<sup>-4</sup> M). Inflorescences were viewed at the sixth leaf stage. Scale: 1 mm.

## Supplemental Tables

**Supplemental Table 1. Measurements of GA<sub>19</sub>, GA<sub>20</sub>, GA<sub>1</sub> and GA<sub>8</sub> levels from WT and *elf3* plants.**

|                  | WT           | <i>elf3</i> | <i>t-test</i> |
|------------------|--------------|-------------|---------------|
| GA <sub>19</sub> | 69.9 (5.96)  | 91.4 (4.84) | P < 0.05      |
| GA <sub>20</sub> | 7.77 (1.19)  | 25.9 (0.63) | P < 0.001     |
| GA <sub>1</sub>  | 2.6 (0.59)   | 13.8 (1.05) | P < 0.001     |
| GA <sub>8</sub>  | 26.95 (2.91) | 52.3 (2.63) | P < 0.001     |

The units for these measurements are ng g<sup>-1</sup> of dry weight. Values given are the mean of four biological replicates and the standard errors are written in parentheses. Leaf tissue was harvested from plants at the fourth leaf stage at ZT 0 h.

**Supplemental Table 2. Oligonucleotide sequences used in qRT-PCR assays**

| Gene                | Orientation | Sequence                 | Source               |
|---------------------|-------------|--------------------------|----------------------|
| <i>HvFT1</i>        | Sense       | ATGAGGACCTTCTACACGCT     | Hemming et al., 2012 |
| EU331775.1          | Anti-sense  | GGCTCTCGTACCACATCACC     |                      |
| <i>HvVRN1</i>       | Sense       | GGAAACTGAAGGCGAAGTTGA    | Greenup et al., 2010 |
| AY785826.1          | Anti-Sense  | TGGTTCTTCTGGCTCTGATATGTT |                      |
| <i>HvGA20 ox.1</i>  | Sense       | GGTACAAGAGCTGCCTCCAC     | This paper           |
| MLOC_16059          | Anti-sense  | CACCACCTTGTCATCTCG       |                      |
| <i>HvGA20 ox.2</i>  | Sense       | CTACGAGCCAATGGGGAG       | This paper           |
| MLOC_56462          | Anti-Sense  | CCAGCAGCTCCATGATCCT      |                      |
| <i>HvGA20 ox.3</i>  | Sense       | GGGGATGTGTGGCAGGAAT      | This paper           |
| MLOC_66389          | Anti-sense  | CAGCCGCATCAGGGAGTC       |                      |
| <i>HvGA20 ox.4</i>  | Sense       | GGACGGCGAGGTGGAC         | This paper           |
| MLOC_34543          | Anti-Sense  | AAGGTGTCGCCGATGTTTAC     |                      |
| <i>HvLFY1</i>       | Sense       | CCGCTCTTCTGCTCC          | This paper           |
| MLOC_14305          | Anti-sense  | GAACACCTGGTTGTCACCT      |                      |
| <i>HvSOC1</i>       | Sense       | CTCGTCGTCTTCTCCCTC       | This paper           |
| JN673265            | Anti-Sense  | TTGCTGCAAATCTGGCTGTA     |                      |
| <i>HvPAP2</i>       | Sense       | TGAAGAGAAAGGAGCAAATGTTAC | This paper           |
| MLOC_64157          | Anti-sense  | GATCAGGTGTCGCCTCCAC      |                      |
| <i>HvPPF1-Like3</i> | Sense       | CGTACTACGAGAACCAGACATC   | Hemming et al., 2012 |
| BM377273            | Anti-Sense  | AAGTGGTGCCTGTTCTTGACG    |                      |
| <i>HvMADS8</i>      | Sense       | AGCAGCAGCAACAACAACAAC    | This paper           |
| MLOC_61901          | Anti-sense  | CTTGGGGCTGGTTTTGAGTA     |                      |
| <i>HvMADS14</i>     | Sense       | GGAAACTGAAGGCGAAGGT      | This paper           |
| MLOC_1852           | Anti-Sense  | CTGTGCTCCAGTTGCTG        |                      |
| <i>HvSPL11</i>      | Sense       | CGTCGTCATTGATGTTTGATG    | This paper           |
| MLOC_62426          | Anti-Sense  | CTTGAAGTCAGATGGGCTGTC    |                      |
| <i>HvSPL12</i>      | Sense       | GGATGTCTACGATGTTTTATGATG | This paper           |
| MLOC_11199          | Anti-sense  | TCCCATGAAGAACTCCACAG     |                      |
| <i>HvSPL14</i>      | Sense       | CAGCATGGTCACTTCTCAGG     | This paper           |
| MLOC_61297          | Anti-Sense  | TACAGGGACCAGTTGGACGA     |                      |
| <i>HvACTIN</i>      | Sense       | GCCGTGCTTTCCTCTATG       | Hemming et al., 2012 |
| AY145451.1          | Anti-Sense  | GCTTCTCCTTGATGTCCCTTA    |                      |
| <i>HvGAPDH</i>      | Sense       | AGGCTATCAAGGCTGCTTCC     | This paper           |
| AB120301.1          | Anti-Sense  | ACCCCACTCGTTGTCATACC     |                      |
| <i>HvGA3ox1</i>     | Sense       | GCACTACCGCCACTTCTCTG     | This paper           |
| AY551430.1          | Anti-Sense  | ACGAGGAACAGCTCCATCAG     |                      |
| <i>HvGA3ox2</i>     | Sense       | GAAGCAGGTTTAACGCAAGA     | This paper           |
| AY551431.1          | Anti-Sense  | TCTCTCTTCGGGGTCTCTTC     |                      |
| <i>HvGA2ox3</i>     | Sense       | GCAGGTGCTGACCAACG        | This paper           |
| MLOC_38462          | Anti-Sense  | GGTGCAATCCTCTGTGTCAA     |                      |
| <i>HvGA2ox4</i>     | Sense       | GACTCCCTCCAGGTTCTGAC     | This paper           |
| AY551432.1          | Anti-Sense  | CGGCGAAGTAGATCATCG       |                      |
| <i>HvGA2ox5</i>     | Sense       | CGAGGGTGTCCATGATCTTC     | This paper           |
| AY551433.1          | Anti-Sense  | TTGTGGGTGCTGCTTGTGA      |                      |
| MLOC_71202          | Sense       | GCCTAGAGATCGCCCTGC       | This paper           |
|                     | Anti-Sense  | CTTTTTGACCATCATCTGC      |                      |
| MLOC_72016.2        | Sense       | CTCCCTCCAGGTGCTGAC       | This paper           |
|                     | Anti-Sense  | GCCGAAGTAGATCACCGACA     |                      |

Genes from barley (*Hordeum vulgare*) with their oligonucleotide sequences as designed using public available sequences (GenBank or Ensembl Plant), which are provided below gene names.

**Supplemental Table 3. Gene identifiers of the GA20ox and GA2ox genes** in barley (*Hordeum vulgare*), Arabidopsis (*Arabidopsis thaliana*), wheat (*Triticum aestivum*), rice (*Oryza sativa*), Maize (*Zea mays*) and *Lolium perenne* that were used for multiple sequence alignments and construction of phylogenetic trees.

| Gene       | Gene Locus ID |
|------------|---------------|
| HvGA20ox1  | MLOC_16059    |
| HvGA20ox2  | MLOC_56462    |
| HvGA20ox3  | MLOC_66389    |
| AtGA20ox1  | At4g25420     |
| AtGA20ox2  | At5g51810     |
| AtGA20ox3  | At5g07200     |
| AtGA20ox4  | At1g60980     |
| AtGA20ox5  | At1g44090     |
| TaGA20ox1a | JF930282      |
| TaGA20ox1b | FR716526      |
| TaGA20ox1d | FR716527      |
| ZmGA20ox1  | NM_001254854  |
| OsGA20ox1  | U50333        |
| OsGA20ox2  | AY114310      |
| HvGA2ox3   | MLOC_38462    |
| HvGA2ox4   | AY551432.1    |
| HvGA2ox5   | AY551433.1    |
| AtGA2ox1   | At1g78440     |
| AtGA2ox2   | At1g30040     |
| AtGA2ox3   | At2g34555     |
| AtGA2ox4   | At1g47990     |
| OsGA2ox1   | AB059416      |
| OsGA2ox2   | AB092484      |
| OsGA2ox3   | AB092485      |
| LpGA2ox5   | EF687858      |

## Supplemental Methods

### GA feedback experiment

WT and *elf3* plants were grown on New Growool Propagating Blocks (Growool Horticultural Systems, New South Wales, Australia) under SD conditions. At the fourth-leaf stage, plants were treated with GA<sub>3</sub> (10<sup>-4</sup> M) at ZT 0 h, or with a control mock treatment. After 3 h exposure to the treatments (ZT 3 h), the youngest emerging leaf was harvested for RNA extraction. Four biological replicates were harvested for each genotype under each treatment condition. Quantitative real-time PCR was performed as described in materials and methods, using oligonucleotides shown in Supplemental Table 2.

### GA extraction and quantification

For each replicate, tissue was ground using liquid nitrogen and freeze-dried. The dry material was weighed and 25 mL of cold (-20 °C) 80% methanol was added, followed by deuterated internal standards ([<sup>2</sup>H<sub>2</sub>]GA<sub>1</sub>, [<sup>2</sup>H<sub>2</sub>]GA<sub>8</sub>, [<sup>2</sup>H<sub>2</sub>]GA<sub>19</sub> and [<sup>2</sup>H<sub>2</sub>]GA<sub>20</sub>). After extraction overnight (4 °C), samples were centrifuged at 4300 rpm for 15 min. Aliquots of the supernatant were then dried and purified using Sep-Pak C18 cartridges, loading the extract in 0.4% acetic acid in water, and eluting GAs with 60% methanol in 0.4% acetic acid. The eluate was dried and purified further as described previously (McAdam and Brodribb, 2013). The eluate was dried again and derivatised by adding 20 µL di-isopropyl ethylamine and 100 µL 500 mM 2-bromoethyl triethylammonium bromide in 85% acetonitrile, and heating at 80 °C for 2 h. After drying, re-suspension in 1% acetic acid and centrifugation (3 min, 13000 rpm), the supernatant was analysed by ultra performance liquid chromatography–tandem mass spectrometry (UPLC-MS/MS) using the instrument described previously (Tivendale et al., 2012).

The UPLC program was 1% acetic acid in water for 30 sec followed by a linear gradient to 15% acetonitrile at 2 min, then to 100% acetonitrile at 11 min and this was followed by immediate reequilibration to starting conditions for 3 min. The flow rate was 0.35 mL/min, the column was held at 35 °C, and the sample compartment was at 6 °C. Approximate retention times for derivatised GA<sub>8</sub>, GA<sub>1</sub>, GA<sub>19</sub> and GA<sub>20</sub> were 3.5, 4.2, 5.4 and 5.7 min, respectively.

The mass spectrometer was operated in positive ion electrospray mode with a needle voltage of 2.8 kV, and MRM was used to detect all analytes. For all GAs except GA<sub>19</sub> a “pseudo MS<sup>3</sup>” strategy was used, in which the protonated molecules underwent “in-source” fragmentation through the use of a relatively high cone voltage resulting in elimination of trimethylamine (59 Da) to create an intense ion 27 Da above the molecular weight of the GA. This ion was then selected in Q1 for MS/MS fragmentation. The cone voltage was 75 V in these cases. The cone voltage for GA<sub>19</sub> was 45 V.

The ion source temperature was 130 °C, the desolvation gas was N<sub>2</sub> at 950 L h<sup>-1</sup>, the cone gas flow was 100 L h<sup>-1</sup>, and the desolvation temperature was 450 °C. Data were processed using MassLynx software. MRM transitions were monitored in two separate time windows, switching at 4.8 min to the GA<sub>19</sub> and GA<sub>20</sub> channels, with a dwell time of 36 msec per channel. The channels used for quantification were as follows, with the transition for endogenous GA given first followed by that for the corresponding deuterated GA: GA<sub>8</sub>, 391.2 to 153.05 and 393.2 to 153.05 (collision energy (CE) 40 V); GA<sub>1</sub>, 375.2 to 153.05 and 377.2 to 153.05 (CE 35 V); GA<sub>19</sub>, 448.3 to 299.1 and 450.3 to 301.1 (CE 30 V). For endogenous GA<sub>20</sub>, peak areas were summed for the transitions 359.2 to 179.1 (CE 35 V), 359.2 to 241.15 (CE 30 V), 359.2 to 269.15 (CE 25 V) and 359.2 to 313.2 (CE 25 V); and for deuterated GA<sub>20</sub>,

summed for the transitions 361.2 to 179.1, 361.2 to 243.15, 361.2 to 271.15 and 361.2 to 315.2.

### **GA application to the *grd2c* mutant**

GA treatments were performed to *grd2c* mutant plants grown under LD conditions (in Conviron CMP6050 growth cabinets) using GA<sub>3</sub> at a concentration of 10<sup>-4</sup> M in 95 % ethanol, which was applied to emerging leaf at the site of the ligule from the youngest fully emerged leaf. GA<sub>3</sub> was applied at three-day intervals from the third leaf stage until the sixth leaf stage. Control mock treatments were also performed in parallel. Images were taken of the inflorescence at the sixth leaf stage.

### **Supplemental References**

- Greenup, A.G., et al.** (2010). *ODDSOC2* is a MADS box floral repressor that is down-regulated by vernalization in temperate cereals. *Plant Physiol.* **153**:1062–1073.
- Hemming, M., Walford, S.A., Fieg, S., Dennis, E.S. and Trevaskis, B.** (2012). Identification of high temperature responsive genes in cereals. *Plant Physiol.* **158**:1439–1450.
- McAdam, S.A.M. and Brodribb, T.J.** (2013). Ancestral stomatal control results in a canalization of fern and lycophyte adaptation to drought. *New Phytol.* **198**:429–441.
- Spielmeier, W., Ellis, M., Robertson, M., Ali, S., Lenton, J.R., and Chandler, P.M.** (2004). Isolation of gibberellin metabolic pathway genes from barley and comparative mapping in barley, wheat and rice. *Theor. Appl. Genet.* **109**: 847–855.
- Tivendale, N.D. et al.** (2012). Biosynthesis of the halogenated auxin, 4-chloroindole-3-acetic acid. *Plant Physiol.* **159**:1055–1063.
